# Supplementary material for: An Anti-Cancer Peptide LVTX-8 Inhibits the Proliferation and Migration of Lung Tumor Cells by Regulating Causal Genes’ Expression in p53-Related Pathways
Source: MDPI journal article supplement (doi:10.3390/toxins12060367), 2020-06-02
Supplement: s1 [file s1]

# An anti-cancer peptide LVTX-8 inhibits the proliferation and migration of lung tumor cells by regulating causal genes expression in specific pathways

Peng Zhang, Yujie Yan, Junting Wang, Xiaoping Dong, Gaihua Zhang, Yong Zeng \* and Zhonghua Liu \*

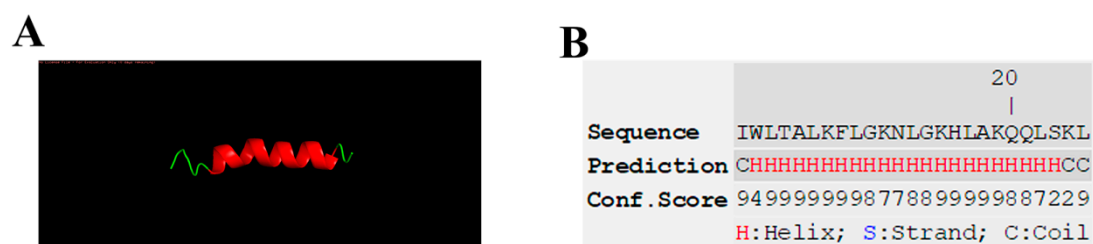

**Figure S1.** Use i-Tasser software to predict the secondary structure of LVTX-8. (A) Diagram of the secondary structure model of LVTX-8. (B) Table of prediction results of secondary structure of LVTX-8 from i-Tasser. The red H indicates that the secondary structure is a helix. The blue S indicates that the secondary structure is a strand. The black H indicates that the secondary structure is a coil. Conf. Score indicates the credibility of the prediction.

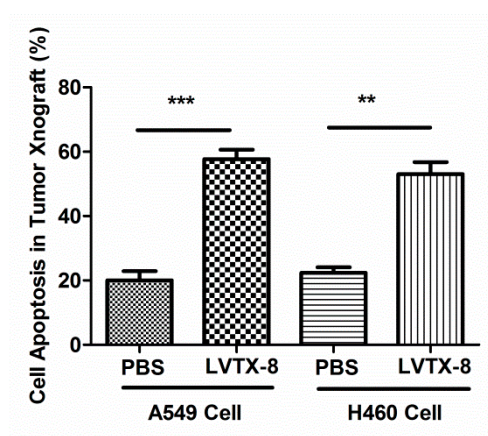

**Figure S2.** Quantitative analysis of TUNEL staining positive cells in tumor xenografts from mice in various groups.
